# Molecular Epidemiology of HIV-1 in Panama: Origin of Non-B Subtypes in Samples Collected from 2007 to 2013

Yaxelis Mendoza<sup>1,2,3,4\*</sup>, Gonzalo Bello<sup>5</sup>, Juan Castillo Mewa<sup>1</sup>, Alexander A. Martínez<sup>1,2,4</sup>, Claudia González<sup>1</sup>, Claudia García-Morales<sup>6</sup>, Santiago Avila-Ríos<sup>6</sup>, Gustavo Reyes-Terán<sup>6</sup>, Juan M. Pascale<sup>1</sup>

**1** Department of Genomics and Proteomics, Gorgas Memorial Institute for Health Studies, Panama City, Panama, **2** Department of Biotechnology, Acharya Nagarjuna University, Guntur City, Andhra Pradesh, India, **3** Department of Genetics and Molecular Biology, University of Panama, Panama City, Panama, **4** INDICASAT-AIP, 219, City of Knowledge, Clayton, Panama City, Panama, **5** Laboratório de AIDS e Imunologia Molecular, Instituto Oswaldo Cruz, FIOCRUZ, Rio de Janeiro, Brazil, **6** Centro de Investigación en Enfermedades Infecciosas, Instituto Nacional de Enfermedades Respiratorias, Mexico City, Mexico

## Abstract

Phylogenetic studies have suggested that the HIV-1 epidemic in the Americas is mainly dominated by HIV subtype B. However, countries of South America and the Caribbean have recently reported changes in their circulating HIV-1 genetic profiles. The aim of this study was to characterize the molecular profile of the HIV-1 epidemic in Panama by the analysis of 655 polymerase gene (*pol*) sequences that were obtained from HIV-infected Panamanians diagnosed between 1987 and 2013. Blood samples were collected from recently infected, antiretroviral drug-naïve and treatment-experienced subjects since mid-2007 to 2013. Viral RNA from plasma was extracted and sequences of HIV protease and reverse transcriptase genes were obtained. Bootscanning and phylogenetic methods were used for HIV subtyping and to trace the putative origin of non-B subtype strains. Our results showed that HIV-1 infections in Panama are dominated by subtype B (98.9%). The remaining 1.1% is represented by a diverse collection of recombinant variants including: three URFs<sub>BC</sub>, one CRF20<sub>BG</sub>, and one CRF28/29<sub>BF</sub>, in addition to one subtype F1 and one subtype C, none of which were previously reported in Panama. The non-B subtype variants detected in Panama were probably introduced from Brazil (subtype F1 and CRF28/29<sub>BF</sub>), Cuba (CRF20<sub>BG</sub>), Dominican Republic (URFs<sub>BC</sub>) and India (subtype C). Panama is the geographical vertex that connects the North with South America and the Caribbean through trade and cultural relations, which may explain the observed introductions of non-B subtype HIV-1 variants from both the Caribbean and South America into this Central American country.

**Citation:** Mendoza Y, Bello G, Castillo Mewa J, Martínez AA, González C, et al. (2014) Molecular Epidemiology of HIV-1 in Panama: Origin of Non-B Subtypes in Samples Collected from 2007 to 2013. PLoS ONE 9(1): e85153. doi:10.1371/journal.pone.0085153

**Editor:** Chiyu Zhang, Institut Pasteur of Shanghai, Chinese Academy of Sciences, China

**Received:** July 23, 2013; **Accepted:** November 23, 2013; **Published:** January 13, 2014

**Copyright:** © 2014 Mendoza et al. This is an open-access article distributed under the terms of the Creative Commons Attribution License, which permits unrestricted use, distribution, and reproduction in any medium, provided the original author and source are credited.

**Funding:** The project was supported in part by Department of Genomics and Proteomics (ICGES) and the Ministry of Health (Panama) and Project PAN-6011 from the International Atomic Energy Agency (IAEA). YM was funded by a fellowship from Secretaría Nacional de Ciencia y Tecnología (SENACYT) and Instituto para la Formación de Recursos Humanos (IFARHU). The funders had no role in study design, data collection and analysis, decision to publish, or preparation of the manuscript.

**Competing Interests:** The authors have declared that no competing interests exist.

\* E-mail: yaxelis\_mendoza@yahoo.com

## Introduction

The Human Immunodeficiency Virus (HIV) is the causative agent of Acquired Immune Deficiency Syndrome (AIDS). During the past decade, the Panamanian HIV/AIDS epidemic has changed dramatically. The accumulated number of adults (15+ years) living with HIV increased from 5,000 to around 18,000–20,000 subjects between the years 2001–2010 [1,2], whereas the number of newly infected people increased up to 14.9% (from 440 to 942 cases) in the same period [3,4]. At the beginning of the Panamanian epidemic, the majority of the infections had occurred between men who have sex with men (MSM); although, since 1991, there has been an increase in the number of infected women [5,6]. Nowadays, recent studies have suggested that the Panamanian epidemic does not have a predominant mode of sexual transmission because bisexual-homosexual and heterosexual modes have similar proportions [2]. Finally, even though the total HIV prevalence has decreased from 1.4% to 0.8% in the general population since 2001 and the prevalence among female sex

workers remains low (0.7–1.6%) [7], the prevalence among MSM continues to steadily increase and reached 23% in 2011 [8]. A higher prevalence of HIV infections among MSM in the Americas was only observed in Jamaica (38%) [8].

The main characteristic of HIV infection is the high genetic variability of virus isolates obtained either sequentially from the same infected subject or from different subjects [9–11]. Phylogenetic studies allow the classification of HIV-1 isolates into four main groups (M, N, O and P) [12]. Currently, HIV-1 group M is responsible for most HIV-1 infections worldwide and has been classified into nine subtypes (A–D, F–H, and J–K), 55 circulating recombinant forms (CRFs) and a large number of unique recombinant forms (URFs) [13,14]. HIV-1 subtype B is the predominant variant in the Americas; although non-B subtypes have also been described with high prevalence in Cuba, Brazil, Argentina, and Uruguay [15]. Panama's geographical position and its historical mission as a country of transit since the colonial era have made the country a highly cosmopolitan nation with close

historical and cultural links with Central, North and South America and the Caribbean. Therefore, the genetic diversity of HIV-1 in Panama is expected to resemble the diverse genetic profile observed in other parts of the Americas and the Caribbean. The only other HIV-1 molecular epidemiologic survey performed in Panama to date, analyzed the *gag*, *pol*, and *env* genes of 133 samples collected between 2004 and 2005, reporting a high prevalence of subtype B (97%) and only two cases of non-B-subtypes (one CRF12\_BF and one CRF02\_AG) [16,17]. The aim of our study was to expand our comprehension of the HIV-1 subtype distribution in Panama by the phylogenetic analysis of the *pol* region of a large number of individuals ( $n = 655$ ) from different regions of the country that were diagnosed over a long time period (1987–2013).

## Materials and Methods

### Study population

Blood samples from HIV-1 seropositive individuals were collected by venipuncture at Gorgas Memorial Institute or received from local hospitals located at different provinces of Panama between mid-2007 to June 2013. HIV-1 *pol* region sequences were obtained using the Viroseq system (Celera Diagnostics, Alameda, CA) or an “in-house” assay (described below) drug resistance genotyping method. Sequence chromatograms from a total of 754 samples were retrieved from the HIV-1 Resistance Genotyping Test computers and carefully re-evaluated with Sequencher Software, version 4.5 (GeneCodes, Michigan, USA). From the 754 sequences obtained, 655 (404 sequences from Viroseq system and 251 sequences from the “in-house” assay) were selected based on sequence length and only one sequence per studied subject. The epidemiological information from the selected subjects was recovered from the Drug-Resistance Genotyping Test form, sent with the sample by an authorized infectious diseases specialist.

### Ethics approval and patient consent

The study cohort included subjects selected from the National Surveillance System ( $n = 466$ ) and recruited from a research project entitled “Molecular Epidemiology of HIV in the Meso-American Region” ( $n = 189$ ). The Gorgas Memorial Institutional Review Board approved the use of samples without an informed written consent from subjects coming only from the national epidemiological surveillance system and only for epidemiological purposes. Informed written consent was obtained from subjects who participated in the research project.

### Pol gene sequencing: “in-house” drug resistance genotyping assay

Plasma samples were centrifuged at 20,000 g for 1 hour and viral RNA was extracted using the QIAamp Viral RNA Mini kit (Qiagen Inc., Valencia, CA). Reverse transcription was performed using the Thermoscript Reverse Transcriptase enzyme (Invitrogen, Carlsbad, CA), following the manufacturer’s instructions. A 1.2 kb fragment of the HIV-1 *pol* gene spanning the complete protease (Pro, codons 1–99) and part of reverse transcriptase (RT, codons 1–235) was amplified by a nested polymerase chain reaction (PCR) using Platinum Taq polymerase (Invitrogen, Carlsbad, CA). Both PCR reactions were performed in a final volume of 50  $\mu$ L with 1.8 mM MgCl<sub>2</sub>, 0.2 mM dNTP mix, 0.2  $\mu$ M each primer. The first round PCR was carried out under the following conditions: 94°C, 2min, 30 cycles at 94°C-20s, 50°C-20s, 72°C-90s, final extension of 72°C-6min. Second round PCR conditions were: 94°C, 2min, 40 cycles at 94°C-20s, 50°C-20s,

72°C-90s, final extension of 72°C-6min. PCR products were electrophoresed on 1% agarose gels and DNA bands of expected size purified using AgarAce enzyme (Promega, Madison, WI). Direct cycle sequencing was performed with seven overlapping segment primers using the ABI Prism BigDye Terminator v3.1 Cycle Sequencing kit and an ABI PRISM 3130xl Genetic Analyzer (Life Technologies, Carlsbad, CA). Primers used for PCR and sequencing have been previously described [18]. Sequence fragments were assembled using the Sequencher software version 4.5 (GeneCodes, Ann Arbor, MI).

### Genetic characterization of HIV-1 sequences

Panamanian sequences were initially classified as “pure” subtypes, CRFs-like or URFs using the online web server for REGA HIV-1 Subtyping Tool software (version 2.0) [19]. Initial classification was confirmed using phylogenetic and recombination analysis. Group M subtype (Table S1) and CRFs reference sequences of the *pol* gene (positions 2252 to 3260 relative to HXB2) were downloaded from Los Alamos HIV Sequence Database (<http://hiv-web.lanl.gov>) and aligned with Panamanian sequences using the ClustalW program implemented in Mega 5.1 software [20]. Phylogenetic trees were constructed by the Neighbor-Joining method under the Tamura-Nei evolutionary model using the MEGA 5.1 software package [20]. The reliability of tree topologies was assessed by bootstrap analysis with 500 replicates. Bootstrap values above 75% were considered significant. Analysis of recombination was initially performed by bootscan analysis as implemented in the Simplot version 3.5.1 [21] using representative of all HIV-1 group M subtypes as reference. Bootstrap values supporting branching with reference sequences were determined in Neighbor-Joining trees constructed using the K2-parameter model, based on 500 replicates, with a 250bp sliding window moving in steps of 10 bases. To better characterize the recombination breakpoints suggested in the previous analyses, the putative recombinants were subjected to informative site analyses as described elsewhere [22]. Fragments of sequences assigned to specific HIV-1 subtypes were finally confirmed by constructing phylogenetic sub-region trees as previously indicated using MEGA 5.1 software.

### Determination of the origin of non-B subtype HIV-1 variants

To determine the most probable geographic origin of the minor HIV-1 genetic variants circulating in Panama, each non-subtype B Panamanian sequence was aligned with the 50 HIV-1 sequences isolated world-wide with the highest BLAST search similarity score and subject to Maximum Likelihood (ML) phylogenetic analysis using the GTR+I+ $\Gamma$  nucleotide substitution model. The ML tree was reconstructed with the PhyML program [23] using an online web server (<http://www.atgc-montpellier.fr/phyml/>). Heuristic tree search was performed using the SPR branch-swapping algorithm and the reliability of the obtained topology was estimated with the approximate likelihood-ratio test (aLRT) [24] based on the Shimodaira-Hasegawa-like procedure. The ML trees were visualized using the FigTree v1.4.0 program (<http://tree.bio.ed.ac.uk/software/figtree/>).

### Statistical analysis

Epidemiological and demographic characteristics of the cohort included in the present study were compared with overall characteristic of the officially reported HIV cases by the Department of Epidemiology of the Ministry of Health (MINS)

**Table 1.** Demographic and clinical characteristics of the study population compared to National Governmental Report of Panamanian HIV cases (1984–2012).

|                                 | Present Study (n = 655) | Overall Panamanian HIV reported cases (n = 18.700) <sup>a</sup> | p value* |
|---------------------------------|-------------------------|-----------------------------------------------------------------|----------|
| <b>Gender</b>                   |                         |                                                                 |          |
| Male                            | 436 (66.6)              | 12,973 (69.4)                                                   | n.s.     |
| Female                          | 219 (33.4)              | 5,730 (30.6)                                                    | n.s.     |
| <b>Clinical Condition</b>       |                         |                                                                 |          |
| AIDS                            | 185 (28.2)              | -                                                               |          |
| Asymptomatic HIV carrier        | 355 (54.2)              | -                                                               |          |
| Unknown                         | 115 (17.56)             | -                                                               |          |
| <b>Mode of HIV Transmission</b> |                         |                                                                 |          |
| Sexual                          | 324 (49.5)              | 11,361 (60.7)                                                   | p<0.05   |
| Homosexual                      | 65 (9.2)                | 1,940 (10.4)                                                    | n.s.     |
| Bisexual                        | 4 (0.6)                 | 690 (3.7)                                                       | n.s.     |
| Heterosexual                    | 255 (38.9)              | 8,731 (40.7)                                                    | n.s.     |
| Blood Products                  | 6 (0.9)                 | 178 (1.0)                                                       | n.s.     |
| Mother-to-child                 | 55 (8.3)                | 564 (3.0)                                                       | p<0.05   |
| Unknown                         | 270 (41.2)              | 6,681 (35.7)                                                    | n.s.     |
| <b>Age group (years)</b>        |                         |                                                                 |          |
| < 14                            | 53 (8.1)                | 633 (3.4)                                                       | n.s.     |
| 15–24                           | 119 (18.2)              | 2,530 (13.5)                                                    | n.s.     |
| 25–29                           | 66 (10.1)               | 2,697 (14.4)                                                    | n.s.     |
| 30–34                           | 97 (14.8)               | 2,993 (16.0)                                                    | n.s.     |
| 35–39                           | 101 (15.4)              | 2,688 (14.4)                                                    | n.s.     |
| 40–44                           | 75 (11.4)               | 2,318 (12.4)                                                    | n.s.     |
| 45–49                           | 63 (9.6)                | 1,654 (8.8)                                                     | n.s.     |
| >50                             | 81 (12.4)               | 3,666 (19.6)                                                    | n.s.     |
| Unknown                         | 0                       | 430 (2.3)                                                       |          |
| <b>Geographic Location</b>      |                         |                                                                 |          |
| East Panama                     | 598 (91.3)              | 14,898 (83.5) <sup>b</sup>                                      | p<0.05   |
| Central Panama                  | 30 (4.5)                | 920 (5.2) b                                                     | n.s.     |
| West Panama                     | 22 (3.4)                | 985 (5.5) b                                                     | n.s.     |
| Unknown                         | 5 (0.8)                 | 1,043 (5.8) b                                                   |          |
| <b>HIV diagnosis</b>            |                         |                                                                 |          |
| 1987–1994                       | 11 (1.7)                | -                                                               |          |
| 1995–1999                       | 36 (5.5)                | -                                                               |          |
| 2000–2004                       | 148 (22.6)              | -                                                               |          |
| 2005–2009                       | 259 (39.5)              | -                                                               |          |
| 2010–2013                       | 191 (29)                | -                                                               |          |

Data are No. (%). Abbreviations: HIV, human immunodeficiency virus; n.s. not significant differences; p<0.05, means significant differences.

\*p value of the two-sample proportion Z-test result.

<sup>a</sup>As indicated by the total of accumulative AIDS and HIV carriers first time diagnosed between September 1984 to September 2012.

<sup>b</sup>As indicated by the total of accumulative AIDS and HIV carriers first time diagnosed between 1984 to 2010.

doi:10.1371/journal.pone.0085153.t001

[1,25] using a Two-sample proportion test. Statistical significance was defined as  $p < 0.05$ .

### Nucleotide Sequence Accession Numbers

The non-subtype B sequences have been deposited in Genbank with accession numbers KF702320 - KF702326.

## Results

### Epidemiological characteristics

The 655 HIV sequences analyzed in our study represent 3.6% of the total estimated number of HIV-infected subjects and 6% of the total number of ARV drug-experienced subjects in Panama who have accessed the National Health System during 2007–2013. In our study, most HIV-infected individuals in the adult population (15+ years) were men (62%), asymptomatic (54%),

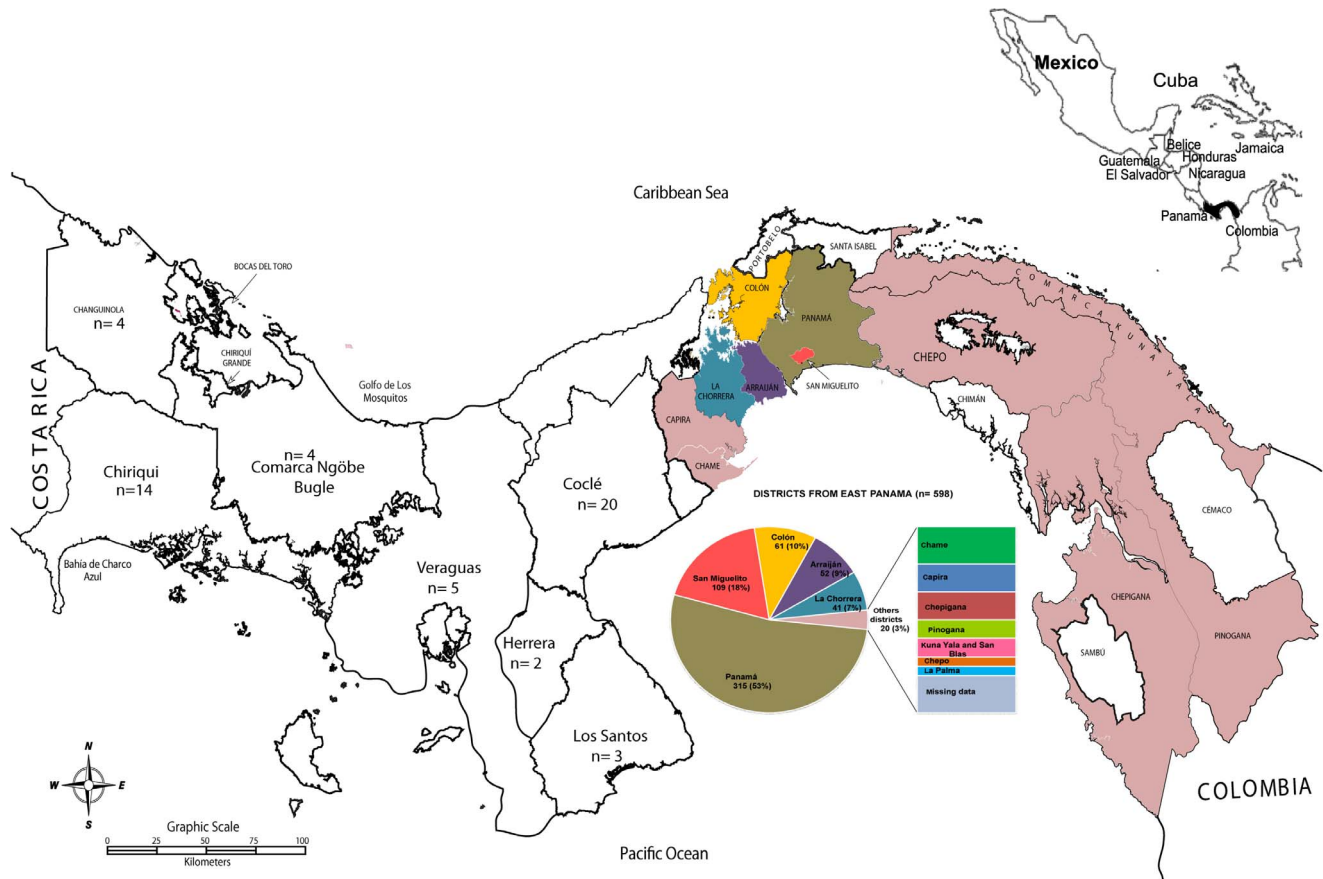

**Figure 1. Geographic distribution of Panamanian subjects living with HIV participating in the study.** Map of Panama indicating the number of infected subjects located in each of the nine provinces (Bocas del Toro, Chiriquí, Veraguas, Herrera, Los Santos, Coclé, Colón, Panamá and Darién) and native territories of Comarcas Ngöbe Buglé, Kuna Yala and Emberá Wouman. The pie chart that represents the proportion of subjects located at the different districts from eastern Panama which includes the provinces of Panama, Colón, Darién and Comarca Kuna Yala. doi:10.1371/journal.pone.0085153.g001

and had a diagnosis during 2005–2009 (35%) (Table 1). The male to female ratio was 2:1 (408/194) in the adult population and 1.2:1 (28/25) in the pediatric population. The main mode of transmission was sexual intercourse (324/655, 49%), followed by mother-to-child transmission (55/655, 8%). Subjects were located in the nine provinces of Panama and the native autonomous territories of Comarca Kuna Yala and Comarca Ngöbe Buglé, although the majority of the subjects were living in the Province of Panamá (527/655; 80%) and Colón (61/655, 10%) (Fig. 1). Statistical analyses show that subjects located in the eastern part of Panama and pediatric subjects acquiring the infection by mother-to-child transmission were found to be significantly different from national reported data (Table 1). However, the others epidemiological characteristics (sexual transmission, clinical condition, gender proportions, age groups and geographic locations), were not statistically different to those found in the national records of HIV-infected subjects (Table 1). Therefore, the cohort included in the present study have these others epidemiological characteristics similar to total population of HIV-infected subjects.

#### Genetic characterization of HIV-1 sequences

Phylogenetic analyses showed that the majority of the HIV-1 sequences were subtype B (648/655, 98.9%) (Fig. 2A). Panamanian subtype B sequences from individuals diagnosed at different time-points were highly intermixed in the phylogenetic tree, with no evidence of expansion of particular lineages among the most

recently diagnosed subjects (Fig. 2B). The remaining samples were classified as subtype F1 (0.15%), subtype C (0.15%), BC (0.5%), BF (0.15%) and BG (0.15%) (Figs. 2A and 3). From the seven non-B variants, all the recombinants (BC, BG and BF) were generated using the “in-house” resistance genotyping assay; whereas the subtypes C and F sequences were generated using Viroseq System. Phylogenetic and bootscan analysis revealed that Panamanian recombinant strains displayed similar recombinant structure and branched together with CRFs 08\_BC, 20\_BG and 28/29\_BF reference sequences (Fig. 3). Informative site analysis of the breakpoints positions revealed that HIV-1 Panamanian BF and BG recombinants displayed the same mosaic structure as the CRFs 28/29\_BF and 20\_BG reference sequences, respectively (Table 2). Panamanian BF and BG recombinants strains also branched together with the corresponding CRFs reference strains in all sub-region phylogenetic trees (Figs. S1 and S2), thus confirming their classification as CRF 20\_BG-like and CRF 28/29\_BF-like strains. The three Panamanian BC recombinants share the first breakpoint position in common with reference CRF08\_BC, but not the second one (Table 2). Phylogenetic analysis of each sub-region showed that Panamanian BC and CRF08\_BC strains branched separately in the subtype B fragment (Fig. S3), thus confirming their classification as URFs\_BC. Epidemiological data on each of the non-B subtypes is shown in Table 3.

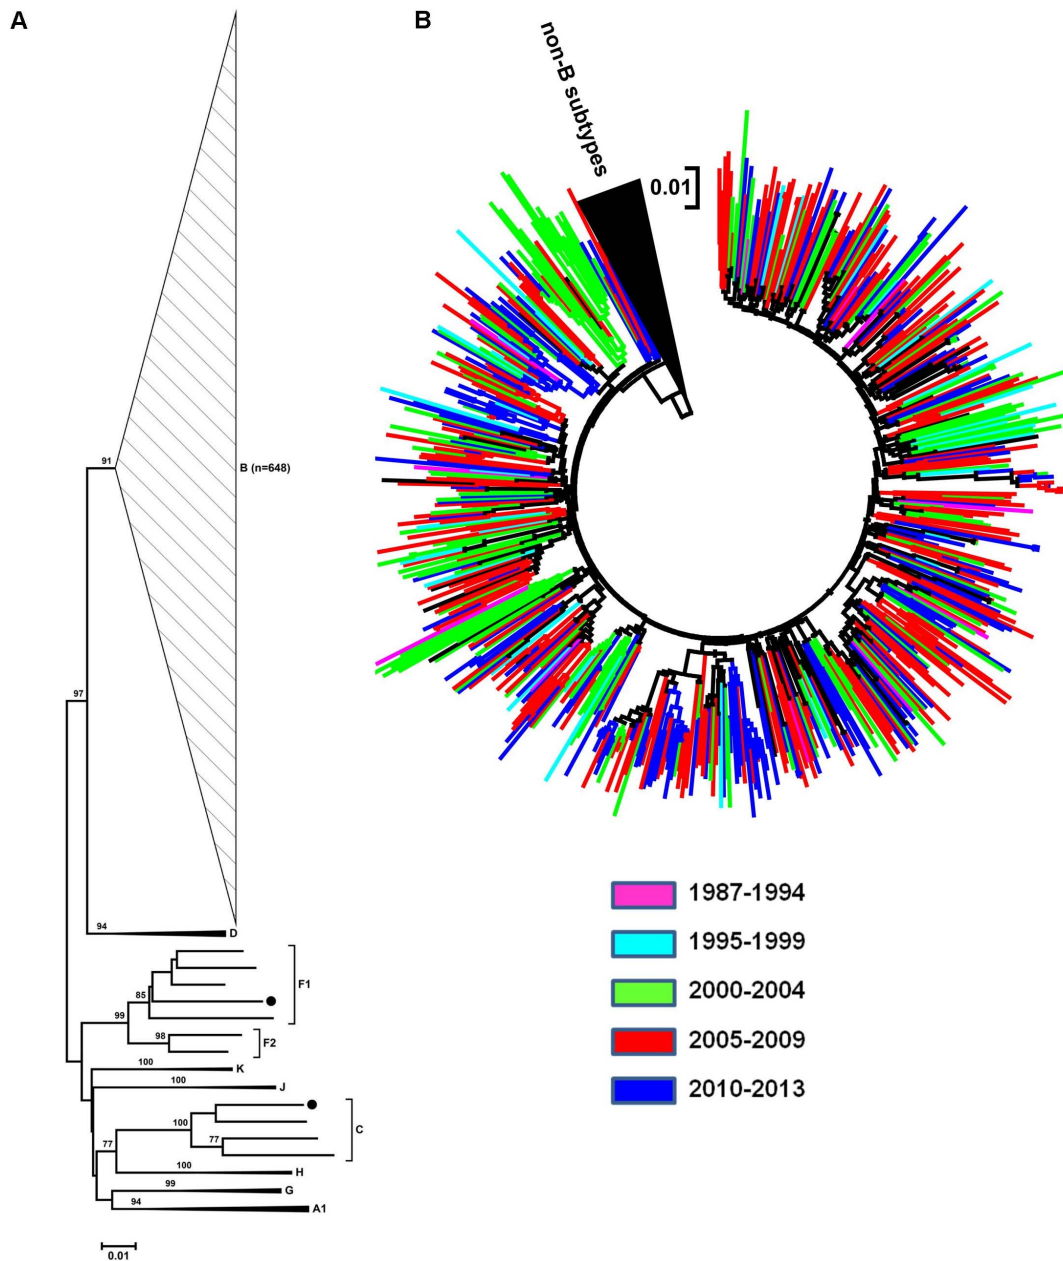

**Figure 2. Phylogenetic Neighbor-Joining tree of HIV *pol* gene sequences from Panamanian infected subjects sampled from 2007 to 2013.** (A) Panamanian HIV (black circles) are clustered with highly support within the clade of subtype B ( $n=648$ ), subtype F1 ( $n=1$ ) and subtype C ( $n=1$ ) reference sequences. For clarification purposes, branches have been compressed by each subtype. Bootstrap values higher than 80 are shown at branches. (B) Clustering of subtype B sequences defined by colored range of diagnostic age. doi:10.1371/journal.pone.0085153.g002

### Origin of non-B subtype HIV-1 variants

ML phylogenetic analyses of non-subtype B Panamanian sequences and world-wide HIV-1 sequences with the highest BLAST search similarity score were performed. Although BLAST search of Panamanian BC recombinants mainly retrieved CRF08\_BC sequences from China (91%); Panamanian BC isolates were not phylogenetically related with that Asian CRF and branched with high support (posterior probability [ $PP$ ] = 0.99%) with one BC isolate from Dominican Republic (Caribbean) and one BC isolate from Spain (Europe) (Fig. 4A). BLAST search of the Panamanian BF recombinant retrieved BF sequences mainly isolated in Brazil (36%), Spain (24%) and the United States

(16%) (Fig. 4B). Phylogenetic analysis showed that Panamanian BF sequence was positioned within a highly supported monophyletic cluster ( $PP = 0.88$ ) that was mainly (94%) composed by BF isolates from Brazil, including the CRF28\_BF and CRF29\_BF sequence references (Fig. 4B). BLAST search of Panamanian BG recombinant selected BG sequences mainly isolated in Cuba (82%) and Spain (16%) (Fig. 4C). The Panamanian BG sequence branched in a highly supported monophyletic cluster ( $PP = 0.91$ ) with CRF20\_BG Cuban sequences (Fig. 4C). BLAST search of Panamanian subtype F1 sequence mainly recovered F1 and BF sequences from Brazil (72%) and Italy (18%). The phylogenetic analysis showed a close relationship between Panamanian and



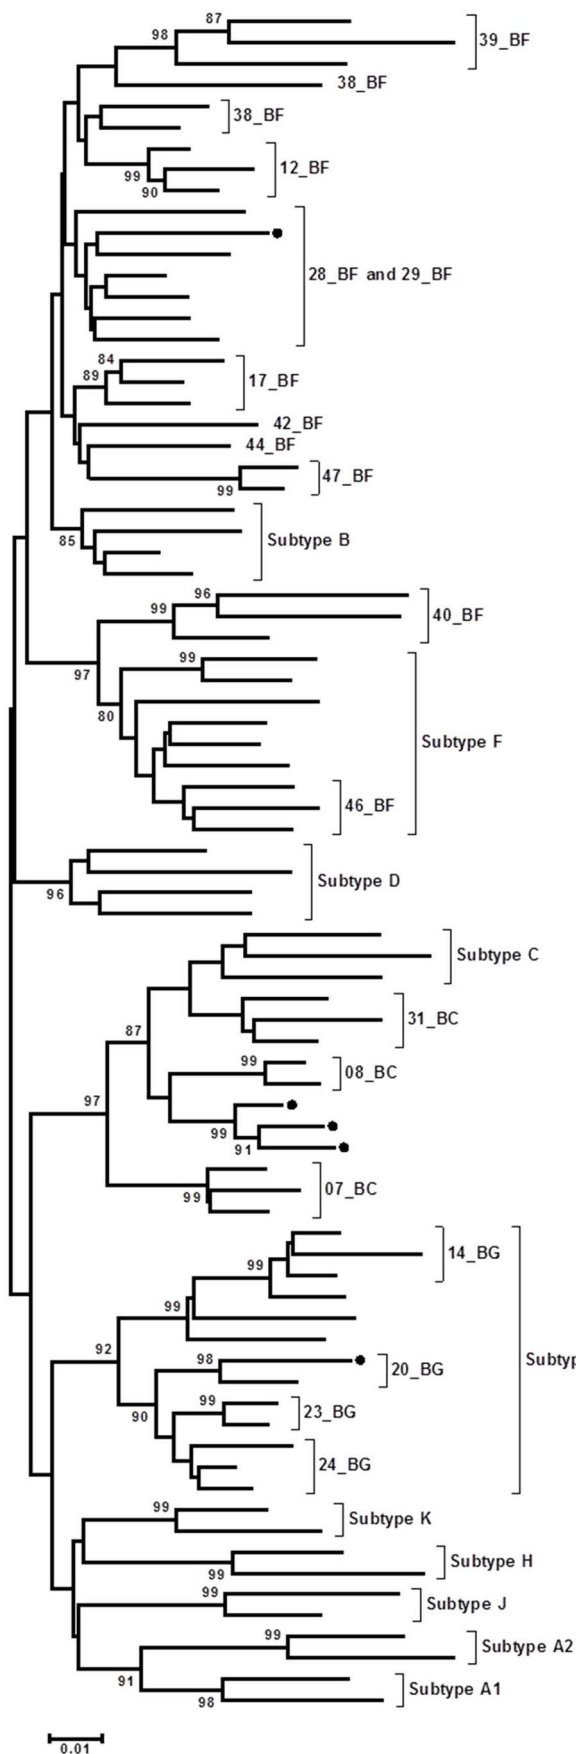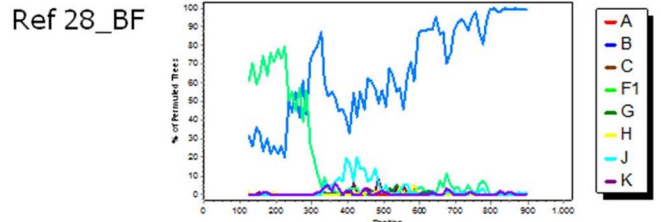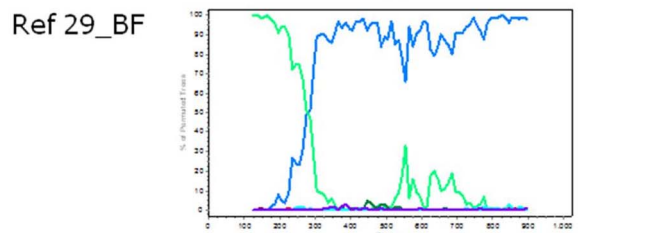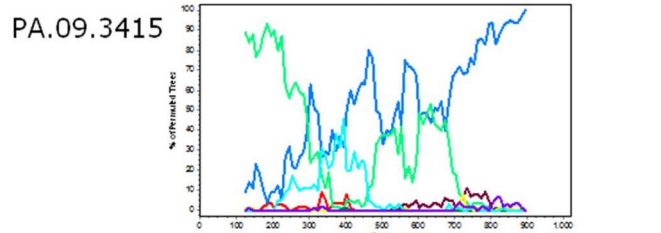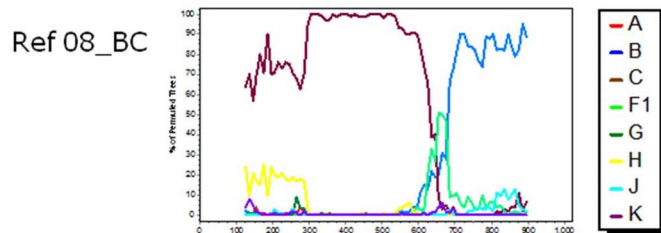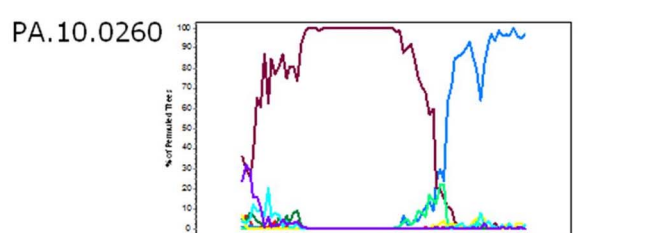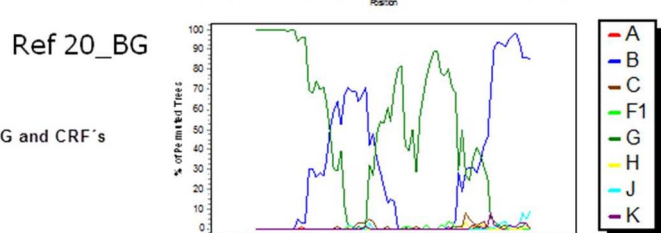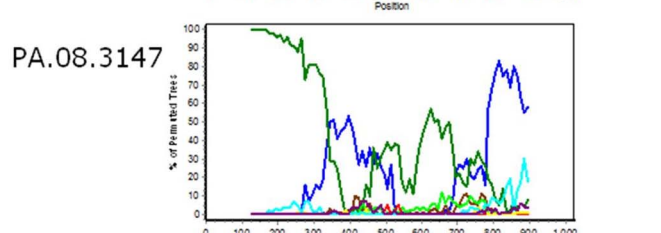

**Figure 3. Phylogenetic Neighbor-Joining tree of HIV *pol* gene sequences from Panamanian HIV recombinant variants BF1, BC and BG clustered with circulating recombinant forms (CRF) references.** Subtypes and CRF references are indicated at right of the brackets. Only bootstrap values of more than 80 are shown at the corresponding nodes. Panamanian isolates are shown with black circles. For clarity purposes, branches have been compressed by each subtype. Bootscanning plots of these recombinants are shown aside. Reference sequences used for bootscanning analyses shown by color (subtype B, blue; subtype F1, green; subtype C, purple; subtype G, dark-green and subtype A1, red). doi:10.1371/journal.pone.0085153.g003

Brazilian subtype F1 samples (Fig. 4D). Finally, BLAST search of Panamanian subtype C isolate recovered sequences mainly isolated in India (38%), China (26%) and South Africa (24%) (Fig. 4E). Phylogenetic analysis showed that Panamanian subtype C sequence was more closely related to subtype C sequences from India than to sequences from other countries (Fig. 4E).

## Discussion

Nearly 29 years after the first diagnosed HIV case in Panama, this molecular epidemiology research represents the largest study to date on HIV subtype distribution in the country. An official report for HIV/AIDS in 2012 by the Ministry of Health (MINS) showed a high percentage of AIDS cases (29.3%) and of asymptomatic carriers (48.7%) that do not define a transmission route [25], as we also observed in our data. This most likely reflects the difficulties of objectively capturing the sexual preference of both male and female subjects attending national

health system clinics as subjects have the legal right of abstaining from giving this information [26]. As most of the epidemiological characteristics of the present study cohort are proportional to the officially reported HIV cases in the country; our study sample may adequately represent Panamanian HIV-1 molecular diversity.

In our study, we found that the Panamanian HIV epidemic is driven predominantly by HIV-1 subtype B, confirming the previous study [16]; but we also described for the first time the circulation of several non-B variants at very low prevalence ( $\leq 0.5\%$ ) that were classified as subtype F1, subtype C, CRF 20\_BG, CRF28/29\_BF and URFs\_BC. Thus, the HIV-1 molecular epidemiology scenario in Panama is more complex than previously described [16,17]; this is most likely due to the much larger number of sequences analyzed in our study.

The subtype F1 and the BF recombinant identified in this study were probably originated in Brazil. The identification of subtype F1 isolated from a heterosexual 47-year-old male was unexpected given the overall low prevalence of this subtype in the Americas,

**Table 2.** Comparative analysis of the breakpoints positions between HIV-1 Panamanian recombinants sequences and the most closely related CRFs sequences.

| Sequence Name/accession number       | Los Alamos |         | Our study |         |
|--------------------------------------|------------|---------|-----------|---------|
|                                      | Position   | Subtype | Position  | Subtype |
| CRF 08_BC AY008715/HM067748          | 2253–2852  | C       | 2253–2854 | C       |
|                                      | 2853–3149  | B       | 2855–3167 | B       |
|                                      | 3150–3275  | C       | 3168–3275 | C       |
| BC_PA.10.0260                        | -          | -       | 2253–2854 | C       |
|                                      | -          | -       | 2855–3275 | B       |
| BC_PA.10.5652                        | -          | -       | 2253–2854 | C       |
|                                      | -          | -       | 2855–3275 | B       |
| BC_PA.12.0103                        | -          | -       | 2253–2854 | C       |
|                                      | -          | -       | 2855–3275 | B       |
| CRF 28_BF DQ085872/DQ085873/DQ085874 | 2253–2571  | F1      | 2253–2574 | F1      |
|                                      | 2572–3275  | B       | 2575–3275 | B       |
| CRF 29_BF DQ085871/DQ085876/AY771590 | 2253–2571  | F1      | 2253–2574 | F1      |
|                                      | 2572–3275  | B       | 2575–3275 | B       |
| BF_PA.09.3415                        | -          | -       | 2253–2574 | F1      |
|                                      | -          | -       | 2575–3275 | B       |
| CRF 20_BG AY586545/AY586544/DQ020274 | 2253–2551  | G       | 2253–2595 | G       |
|                                      | 2552–2740  | B       | 2596–2736 | B       |
|                                      | 2741–2974  | G       | 2737–2994 | G       |
|                                      | 2975–3181  | B       | 2995–3171 | B       |
|                                      | 3182–3275  | G       | 3172–3275 | G       |
| BG_PA.08.3147                        | -          | -       | 2253–2595 | G       |
|                                      | -          | -       | 2596–2736 | B       |
|                                      | -          | -       | 2737–2994 | G       |
|                                      | -          | -       | 2995–3171 | B       |
|                                      | -          | -       | 3172–3275 | G       |

doi:10.1371/journal.pone.0085153.t002

**Table 3.** Epidemiological information of Panamanian subjects with non-B subtypes and recombinant variants BG, BC and BF.

|                                              | BG        | BF             | BC      | BC          | BC             | Subtype F1     | Subtype C      |
|----------------------------------------------|-----------|----------------|---------|-------------|----------------|----------------|----------------|
| Sample name                                  | PA-3147   | PA-3415        | PA-0260 | PA-5652     | PA-0103        | PA-P098        | PA-4704        |
| Gender                                       | M         | M              | M       | F           | F              | M              | F              |
| Age                                          | 25        | 30             | 48      | 36          | 37             | 47             | 56             |
| Diagnosis date                               | 2008      | 2009           | 2009    | 2007        | 1998           | 2007           | 2006           |
| Mode of transmission                         | U         | U              | U       | HE          | HE             | HE             | U              |
| Clinical condition                           | ASY       | U              | AIDS    | ASY         | AIDS           | AIDS           | U              |
| <b>Geographic area</b>                       |           |                |         |             |                |                |                |
| (Province                                    | Chiriquí/ | Panamá/        | Colón/  | Panamá/     | Panamá/        | Panamá/        | Panamá/        |
| /District)                                   | Boquete   | Panamá         | Colón   | La Chorrera | Panamá         | Panamá         | San Miguelito  |
| Patient drug status                          | NA        | U              | NA      | EX          | EX             | EX             | EX             |
| Time under ARV treatment (years)             | -         | U              | -       | 2           | 11             | U              | 7              |
| Viral Load (copies/ml)                       | 518       | 3220           | 4311023 | 36358       | 5230           | 121564         | 117615         |
| Presence of mutations to ARV drug inhibitors | none      | Minor protease | none    | none        | NRTI and NNRTI | Minor protease | NRTI and NNRTI |

Abbreviations: M, male; F, female; U, not known; HE, heterosexual; ASY, asymptomatic; AIDS, acquired immunodeficiency syndrome; NA, naïve; EX, experienced; NRTI, nucleosidic reverse transcriptase inhibitor; NNRTI, non-nucleosidic reverse transcriptase inhibitor.  
doi:10.1371/journal.pone.0085153.t003

with exception of some Brazilian regions where it accounts for 10–20% of infections [27–33]. The BF recombinants are much more common in countries of the Southern Cone of South America [31]. A previous study described the detection of CRF12\_BF, a recombinant characteristic of Argentina and Uruguay [34], in a Panamanian 38-year-old heterosexual male diagnosed in 1989 [16,17]. The BF sequence identified in our study, by contrast, has a similar *pol* mosaic structure of CRF28/29\_BF and was isolated from a 36-year-old male from the District of Panama diagnosed in 2009. This BF variant is particularly prevalent in the Brazilian city of Santos where it accounts for about 25% of infections [35,36]. Of note, a recent study in Costa Rica also described the circulation of CRF17\_BF and CRF29\_BF [37], thus confirming a relative frequent influx of HIV-1 BF strains from South America into Central America.

The three Panamanian BC recombinants were isolated from one male and two females diagnosed in 1998, 2007 and 2009. Two of them were living in the province of Panama (cities of Panama and Arraiján) and one in the province of Colon (City of Colon). These two cities are the main ports for cruises and commercial trades and are located on opposite ends of the Panama Canal. Panamanian BC recombinant viruses detected in our study were phylogenetically related among each other and with two URFs\_BC viruses detected in Spain [38] and Dominican Republic [39] in 2007 and 2005, respectively. The HIV-1 epidemic in Dominican Republic is dominated by subtype B and the URF\_BC strain was described as a full-length genome [39]. Since sequences with a similar *pol* mosaic structure have been identified in at least six epidemiological unlinked subjects from three different countries, there is a possibility that there could be a new CRF\_BC of Caribbean or Central American origin. Full-length genome sequencing of the HIV-1 BC Panamanian variants should be conducted to determine the URF or CRF status of those recombinant sequences.

The recombinant BG detected in Panama was a CRF20\_BG-like virus isolated from a recently infected (in 2008) 25-year-old male who resided in the province of Chiriquí, near the Costa Rican border. Interestingly, recombinant BG has been also

identified in a previous study from Costa Rica [37]. The CRF20\_BG accounts for nearly 10–20% of HIV-1 infections in Cuba and is rarely observed outside this country [40–44], thus supporting a direct epidemiological link between CRF20\_BG-like sequences from Panama and Cuba. Finally, the HIV-1 subtype C virus found in our study was phylogenetically related with the Indian subtype C lineage. A result that was agreed with our epidemiological data that the Panamanian subtype C virus was obtained from an Indian immigrant woman who was infected in her country of origin where subtype C is highly prevalent [45,46].

The results from this study indicate an increasing introduction over the last 15 years of non-B subtype HIV-1 variants into Panama, particularly from South America (Brazil), the Caribbean (Cuba and Dominican Republic) and Asia (India). Panama has an 16.8% increase of foreign visitors in 2011 and 3.4% in stock of immigrants as percentage of population in 2010 [47,48]. This increment is mainly explained by the improved governmental strategies that bring in tourists and by increases in construction of large-scale economic development projects that bring in immigrant workers [47,49]. The greatest number of foreign travelers who visit Panama are most commonly from Colombia, China, the Dominican Republic, United States, Nicaragua, Costa Rica, Peru, Spain, Mexico and India [47]. Nevertheless, there have also been increases since 2008 in arrivals of visitors from South America, such as: Brazil (51.9%), Argentina (32.1%), Bolivia (41.5%), Ecuador (42.5%) and Venezuela (27.8%) [49,50]. Furthermore, foreign residents with legal immigration status are mainly from South America (43.2%), Asia (15.7%), Central America (14.7%), North America (11.2%), the Caribbean (7.2%), and Europe (7.0%) [48]. Panama is a country of transit and commercial ports that trade and connect the Americas with Europe and Asia, which may potentiate the introduction of non-B variants. Of note, national epidemiological reports suggest that HIV epidemic is concentrated in high risk groups of MSM and sex workers [7,25]. However, the impact of foreign travelers and immigrants in Panamanian HIV epidemic is unknown. Because of this, a cross-country epidemiological survey should be conducted in order to fully determine the



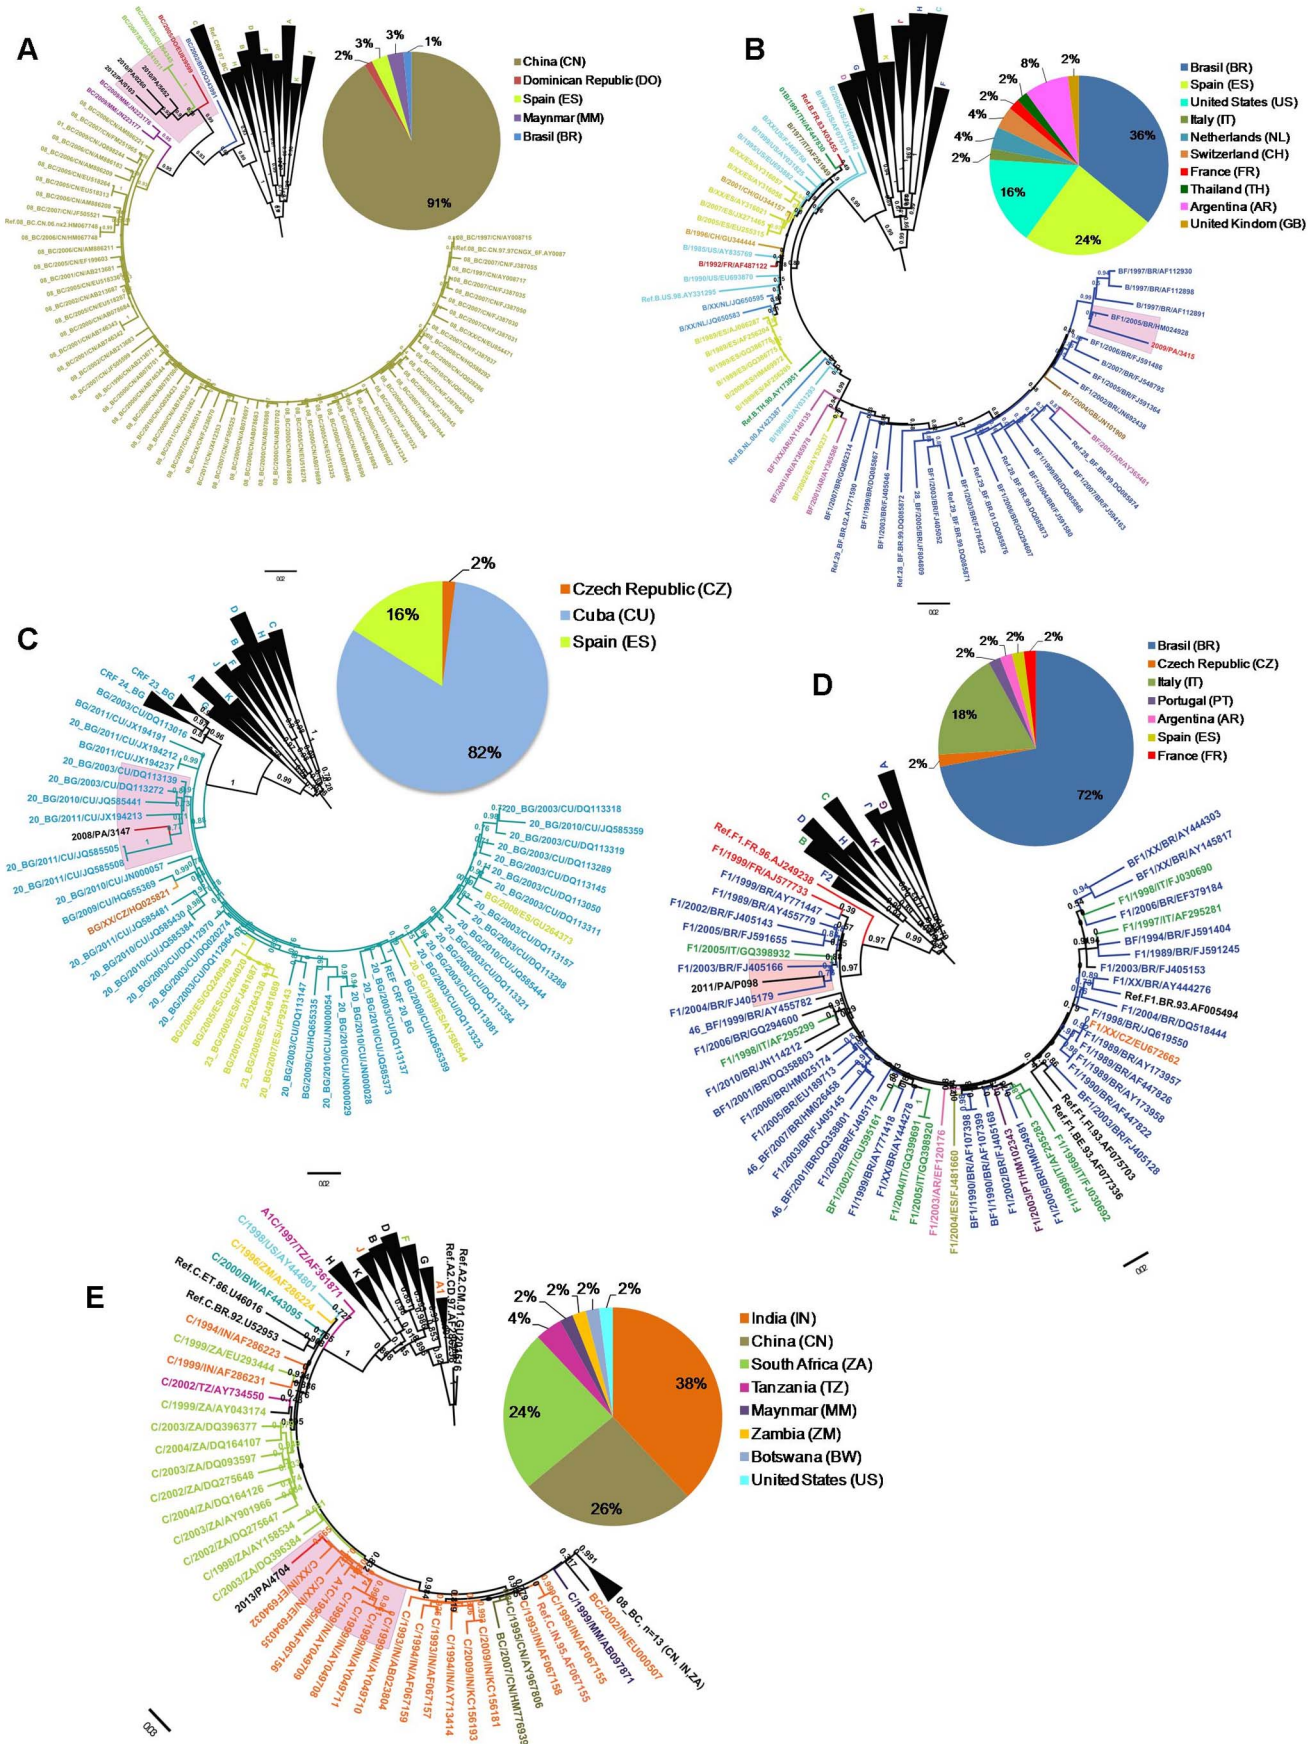

**Figure 4. *pol* gene ML phylogenetic tree of non-B HIV-1 Panamanian sequences and 50 highly similar (nucleotide similarity > 94%) sequences from other countries selected with Blastn analyses.** (A) BC recombinant. (B) BF1 recombinant. (C) BG recombinant. (D) subtype F1 (E) subtype C. Panamanian non-B sequences are shown in highlighted red color. The tree was rooted using reference subtype sequences. The numbers along branches correspond to aLRT values. Bar is in nucleotide substitutions per site. The pie chart shows the proportion of countries represented by the Blastn analysis. Countries correspond with defined colors which are specified in each pie chart.  
doi:10.1371/journal.pone.0085153.g004

HIV genetic diversity in most HIV infected populations, which would lead to improved HIV prevention programs.

Although our study only represents a small minority of the total estimated number of HIV subjects in the country, we demonstrate that a diverse non-B subtype variant circulates among subjects who required ARV drug resistance test. HIV viral diversity in the population being tested must be considered in selection of the viral load platform and ARV drug genotyping test. This nucleic acid or signal amplification assays rely on the use of sequence specific primers and/or probes. Therefore, HIV-1 increased heterogeneity may affect assay performance as the presence of natural polymorphisms in the target regions may reduce or inhibit hybridization thereby compromising the reliability of viral load quantification and genotyping test [51,52]. Our “in-house” genotyping method was first designed using primers validated for subtype B. Successful amplification in most of the samples was only obtained with primers set accordingly to HIV-1 genetic diversity in our population. In fact, the five recombinants variants (BG, BC and BF) were successfully sequenced with our genotyping system. ViroSeq HIV-1 Genotyping System v2.0 has shown a decrease in performance on HIV-1 non-B strains in certain countries however, in Panama this diagnostic test has proven to perform well [52]. Recent studies evaluating viral load diagnostics test on current HIV genetic complexity found a lower correlations with subtypes C samples [53]. Therefore, the diverse non-B subtypes found in our study may play a significance influence on public health decision takers.

Understanding the continuous changes in the genetic profile of HIV epidemic is crucial since HIV genetic diversity has important implications for diagnostics, vaccine design, susceptibility to antiretroviral drugs, transmission capacity and virulence of the circulating virus, and disease progression [54]. The permanent survey of HIV genetic diversity in the infected Panamanian population over time is the first step in developing a full quantitative understanding of the processes that have shaped the Panamanian HIV epidemic and its evolution.

## Supporting Information

**Figure S1** Schematic HIV-1 *pol* gene structure of the Panamanian recombinants BC samples (black circles) identified by NJ sub-

## References

- (2011) Boletín estadístico 2010. República de Panamá: Departamento de Registros y Estadísticas de Salud. Dirección Nacional de Planificación. Ministerio de Salud. pp. 113.
- Teva I, Bermudez MP, Ramiro MT, Buela-Casal G (2012) [Current epidemiological situation of HIV/AIDS in Latin America: Analysis of differences among countries]. *Rev Med Chil* 140: 50–58.
- Comisión Nacional para la Prevención y Control del VIH SIDA C (2009) Plan Estratégico Nacional Multisectorial de ITS VIH y Sida 2009-2014. Panamá: Programa Nacional de ITS VIH y SIDA. Ministerio de Salud de Panamá. 1–108 p.
- Castillero JR (2011) Diagnóstico de Redes Regionales y Nacionales, Organizaciones y Grupos en formación que realizan proyectos y actividades dirigidas a la prevención y/o atención del VIH con población PEMAR. República de Panamá: Programa de USAID para fortalecer la respuesta centroamericana al VIH (USAID/ PASCA).
- Reeves WC, Cuevas M, Arosemena JR, De Lao SL, Gomez B, et al. (1988) Human immunodeficiency virus infection in the Republic of Panama. *Am J Trop Med Hyg* 39: 398–405.
- Guerrero Delgado G, Penna Franco M (1994) [The epidemiological surveillance of AIDS in Panama]. *Rev Med Panama* 19: 186–192.
- Hakre S, Arteaga G, Nunez AE, Bautista CT, Bolen A, et al. (2013) Prevalence of HIV and other sexually transmitted infections and factors associated with syphilis among female sex workers in Panama. *Sex Transm Infect* 89: 156–164.
- UNAIDS (2012) Global Report. Report on the global AIDS epidemic
- Meyerhans A, Cheynier R, Albert J, Seth M, Kwok S, et al. (1989) Temporal fluctuations in HIV quasisppecies in vivo are not reflected by sequential HIV isolations. *Cell* 58: 901–910.
- Nowak M, May R, Anderson R (1990) The evolutionary dynamics of HIV-1 quasisppecies and the development of immunodeficiency disease. *AIDS* 4: 1095–1103.
- Smyth RP, Davenport MP, Mak J (2012) The origin of genetic diversity in HIV-1. *Virus Res* 169: 415–429.
- Simon F, Maucelere P, Roques P, Loussert-Ajaka I, Muller-Trutwin MC, et al. (1998) Identification of a new human immunodeficiency virus type 1 distinct from group M and group O. *Nat Med* 4: 1032–1037.

region trees analyses according to breakpoints position defined. Bootstrap values greater than 75% are indicated.

(TIF)

**Figure S2** Schematic HIV-1 *pol* gene structure of the Panamanian recombinants BF1 sample (black circle) identified by NJ sub-region trees analyses according to breakpoints position defined. Bootstrap values greater than 75% are indicated.

(TIF)

**Figure S3** Schematic HIV-1 *pol* gene structure of the Panamanian recombinants BG sample (black circle) identified by NJ sub-region trees analyses according to breakpoints position defined. Bootstrap values greater than 75% are indicated.

(TIF)

**Table S1** Subtypes reference strains used in the comparative analysis of the breakpoints positions, recombination analysis and phylogenetic analysis.

(DOCX)

## Acknowledgments

We are indebted to the people living with HIV who participated in this study. We express our sincere appreciation to nurses, infectious diseases specialist and laboratory staff of local hospitals and the HIV/AIDS clinic at the Gorgas Memorial Institute for Health Studies (ICGES) for their dedication and commitment to patient care, especially to Yamitzel Zaldívar, Migdalys Ortega, Alma Ortiz, Dayana Best and Fedora Lanza. We also thank to Dr. Aurelio Nuñez and the staff of the National Program of STI/HIV/AIDS and to the Department of Epidemiology (MINSa, Panama). We extend our appreciation to the laboratory technicians at the Centro de Investigación en Enfermedades Infecciosas (Instituto Nacional de Enfermedades Respiratorias, Mexico City, Mexico) and at Department of Genomics and Proteomics (ICGES, Panama) for technical support on *pol* gene sequences used in the study. Thanks also to Amanda Gabster for helpful comments on English language usage.

## Author Contributions

Conceived and designed the experiments: YM GB JMP. Performed the experiments: YM JCM AAM CG CGM. Analyzed the data: YM GB AAM. Contributed reagents/materials/analysis tools: SAR GRT JMP GB. Wrote the paper: YM GB.

13. Carr JK, Foley BT, Leitner T, Salminen M, Korber B, et al. (1998) Reference Sequences Representing the Principal Genetic Diversity of HIV-1 in the Pandemic. *Human retroviruses and AIDS: a compilation and analysis of nucleic acid and amino acid sequences* Los Alamos, New Mexico.: Los Alamos National Laboratory.
14. Hemelaar J (2012) The origin and diversity of the HIV-1 pandemic. *Trends Mol Med* 18: 182–192.
15. Thomson MM, Najera R (2005) Molecular epidemiology of HIV-1 variants in the global AIDS pandemic: an update. *AIDS Rev* 7: 210–224.
16. Ahumada-Ruiz S, Casado C, Toala-Gonzalez I, Flores-Figueroa D, Rodriguez-French A, et al. (2008) High divergence within the major HIV type 1 subtype B epidemic in Panama. *AIDS Res Hum Retroviruses* 24: 1461–1466.
17. Ahumada-Ruiz S, Flores-Figueroa D, Toala-Gonzalez I, Thomson MM (2009) Analysis of HIV-1 pol sequences from Panama: identification of phylogenetic clusters within subtype B and detection of antiretroviral drug resistance mutations. *Infect Genet Evol* 9: 933–940.
18. Castillo J, Arteaga G, Mendoza Y, Martínez AA, Samaniego R, et al. (2011) Central Americas first WHO threshold survey for transmitted HIV drug resistance in Panama. *Rev Panam Salud Publica* 30: 649–656.
19. de Oliveira T, Deforche K, Cassol S, Salminen M, Paraskevis D, et al. (2005) An automated genotyping system for analysis of HIV-1 and other microbial sequences. *Bioinformatics* 21: 3797–3800.
20. Tamura K, Dudley J, Nei M, Kumar S (2007) MEGA4: Molecular Evolutionary Genetics Analysis (MEGA) software version 4.0. *Mol Biol Evol* 24: 1596–1599.
21. Lole K, Bollinger R, Paranjape R, Gadkari D, Kulkarni S, et al. (1999) Full-Length Human Immunodeficiency Virus Type 1 Genomes from Subtype C-Infected Seroconverters in India, with Evidence of Intersubtype Recombination. *Journal of Virology* 73: 152–160.
22. Sierra M, Thomson MM, Rios M, Casado G, Castro RO, et al. (2005) The analysis of near full-length genome sequences of human immunodeficiency virus type 1 BF intersubtype recombinant viruses from Chile, Venezuela and Spain reveals their relationship to diverse lineages of recombinant viruses related to CRF12\_BF. *Infect Genet Evol* 5: 209–217.
23. Guindon S, Dufayard JF, Lefort V, Anisimova M, Hordijk W, et al. (2010) New Algorithms and Methods to Estimate Maximum-Likelihood Phylogenies: Assessing the Performance of PhyML 3.0. *Systematic Biology* 59: 307–321.
24. Anisimova M, Gascuel O (2006) Approximate likelihood-ratio test for branches: A fast, accurate, and powerful alternative. *Systematic Biology* 55: 539–552.
25. Martínez H, Castillero JR (2012) Informe nacional sobre los progresos realizados en el país, Panamá, 2012. República de Panamá: Programa Nacional ITS/VIH/SIDA: Ministerio de Salud.
26. (2000) Ley General sobre las infecciones de transmisión sexual, el virus de la inmunodeficiencia humana y sida del 7 de enero de 2000. Ley No 3. República de Panamá: Gaceta Oficial No.23,964.
27. Bongertz V, Bou-Habib DC, Brígido LF, Caseiro M, Chequer PJ, et al. (2000) HIV-1 diversity in Brazil: genetic, biologic, and immunologic characterization of HIV-1 strains in three potential HIV vaccine evaluation sites. Brazilian Network for HIV Isolation and Characterization. *J Acquir Immune Defic Syndr* 23: 184–193.
28. Brindeiro RM, Diaz RS, Sabino EC, Morgado MG, Pires IL, et al. (2003) Brazilian Network for HIV Drug Resistance Surveillance (HIV-BResNet): a survey of chronically infected individuals. *AIDS* 17: 1063–1069.
29. Teixeira SL, Bastos FI, Telles PR, Hacker MA, Brígido LF, et al. (2004) HIV-1 infection among injection and ex-injection drug users from Rio de Janeiro, Brazil: prevalence, estimated incidence and genetic diversity. *J Clin Virol* 31: 221–226.
30. Cavalcanti AMLH, Brito AM, Pereira S, Medeiros D, Oliveira S (2007) Antiretroviral resistance in individuals presenting therapeutic failure and subtypes of the human immunodeficiency virus type 1 in the Northeast Region of Brazil. *Mem Inst Oswaldo Cruz* 102: 785–792.
31. Bello G, Soares MA, Schrago CG (2011) The use of bioinformatics for studying HIV evolutionary and epidemiological history in South America. *AIDS Res Treat* doi:10.1155/2011/154945.
32. Cavalcanti AMS, de Brito AM, Medeiros SD, Oliveira de Lima K, Pereira da Silva S, et al. (2012) Primary resistance of HIV to antiretrovirals among individuals recently diagnosed at voluntary counselling and testing centres in the metropolitan region of Recife, Pernambuco. *Mem Inst Oswaldo Cruz* 107: 450–457.
33. Tupinambás U, Duani H, Aleixo AW, Martins AVC, Greco DB (2013) Transmitted human immunodeficiency virus-1 drug resistance in a cohort of men who have sex with men in Belo Horizonte, Brazil - 1996–2012. *Mem Inst Oswaldo Cruz* 108: 470–475.
34. Carr JK, Avila M, Gomez Carrillo M, Salomon H, Hierholzer J, et al. (2001) Diverse BF recombinants have spread widely since the introduction of HIV-1 into South America. *AIDS* 15: F41–47.
35. De Sa Filho DJ, Sucupira MC, Caseiro MM, Sabino EC, Diaz RS, et al. (2006) Identification of two HIV type 1 circulating recombinant forms in Brazil. *AIDS Res Hum Retroviruses* 22: 1–13.
36. de Sa-Filho DJ, Soares Mda S, Candido V, Gagliani LH, Cavaliere E, et al. (2008) HIV type 1 pol gene diversity and antiretroviral drug resistance mutations in Santos, Brazil. *AIDS Res Hum Retroviruses* 24: 347–353.
37. Taylor-Castillo L, León-Bratti MP, Solano-Chinchilla A, Herrera-Martínez G, Boza-Cordero R, et al. (2010) Variability in HIV-1 partial genomic sequences in Costa Rican patients: analysis with different bioinformatics tools. *Rev Panam Salud Publica* 27: 23–31.
38. De Mendoza C, Garrido C, Poveda E, Corral A, Zahonero N, et al. (2009) Changes in drug resistance patterns following the introduction of HIV type 1 non-B subtypes in Spain. *AIDS Res Hum Retroviruses* 25: 967–972.
39. Nadai Y, Eyzaguirre LM, Sill A, Cleghorn F, Nolte C, et al. (2009) HIV-1 epidemic in the Caribbean is dominated by subtype B. *PLoS ONE* 4: e4814.
40. Sierra M, Thomson MM, Posada D, Perez L, Aragones C, et al. (2007) Identification of 3 phylogenetically related HIV-1 BG intersubtype circulating recombinant forms in Cuba. *J Acquir Immune Defic Syndr* 45: 151–160.
41. Gonzalez-Alba JM, Holguin A, Garcia R, Garcia-Bujalance S, Alonso R, et al. (2011) Molecular surveillance of HIV-1 in Madrid, Spain: a phylogeographic analysis. *J Virol* 85: 10755–10763.
42. Kouri V, Aleman Y, Perez L, Perez J, Fonseca C, et al. (2012) High frequency of antiviral drug resistance and non-B subtypes in HIV-1 patients failing antiviral therapy in Cuba. *J Clin Virol* 55: 348–355.
43. Machado LY, Blanco M, Dubed M, Diaz HM, Ruiz NM, et al. (2012) HIV type 1 genetic diversity in newly diagnosed Cuban patients. *AIDS Res Hum Retroviruses* 28: 956–960.
44. Perez L, Kouri V, Aleman Y, Abrahantes Y, Correa C, et al. (2013) Antiretroviral drug resistance in HIV-1 therapy-naive patients in Cuba. *Infect Genet Evol* 14: 144–150.
45. Neogi V, Bontell I, Shet A, De Costa A, Gupta S (2012) Molecular Epidemiology of HIV-1 Subtypes in India: Origin and Evolutionary History of the Predominant Subtype C. *PLoS ONE* 7: e39819.
46. Shen C, Craigio J, Ding M, Chen Y, P G (2011) Origin and Dynamics of HIV-1 Subtype C Infection in India. *PLoS ONE* 6: e25956.
47. Ratha D, Mohapatra S, Silwal A (2011) Migration and remittances: factbook 2011. Migration and Remittances Unit, World Bank. Available: [www.worldbank.org/prospects/migrationandremittances](http://www.worldbank.org/prospects/migrationandremittances). Accessed 2013 Oct 14. pp. 201.
48. (2010) Estimaciones y Proyecciones de la Población Total, Urbana Rural en la República, Por Provincia, Comarca Indígena, según sexo y Grupos de Edad: Años 2000-10. República de Panamá: Contraloría General. Dirección Nacional de Estadística y Censo.
49. (2012) Boletín Estadístico 2002–2011: Resumen ejecutivo. República de Panamá Autoridad de Turismo de Panamá. Departamento de Estadística.
50. (2012) Movimiento internacional de pasajeros. Estadística panameña. Situación demográfica, sección 231: Migración internacional. República de Panamá: Contraloría General. Dirección Nacional de Estadística y Censo.
51. Holguin A, Lopez M, Molinero M, Soriano V (2008) Performance of three commercial viral load assays, Versant human immunodeficiency virus type 1 (HIV-1) RNA bDNA v3.0, Cobas AmpliPrep/Cobas TaqMan HIV-1, and NucliSens HIV-1 EasyQ v1.2, testing HIV-1 non-B subtypes and recombinant variants. *J Clin Microbiol* 46: 2918–2923.
52. Thiam M, Diop-Ndiaye H, Kebe K, Vidal N, Diakhate-Lo R, et al. (2013) Performance of the ViroSeq HIV-1 genotyping system v2.0 on HIV-1 strains circulating in Senegal. *J Virol Methods* 188: 97–103.
53. Manak M, Sina S, Anekella B, Hewlett I, Sanders-Buell E, et al. (2012) Pilot studies for development of an HIV subtype panel for surveillance of global diversity. *AIDS Res Hum Retroviruses* 28: 594–606.
54. Geretti AM (2006) HIV-1 subtypes: epidemiology and significance for HIV management. *Curr Opin Infect Dis* 19: 1–7.
